# Supplementary material
Source: PubMed Central journal article supplement (PMC6716211)
Supplement: jf9b02423_si_001.pdf [file jf9b02423_si_001.pdf]

## Supporting information

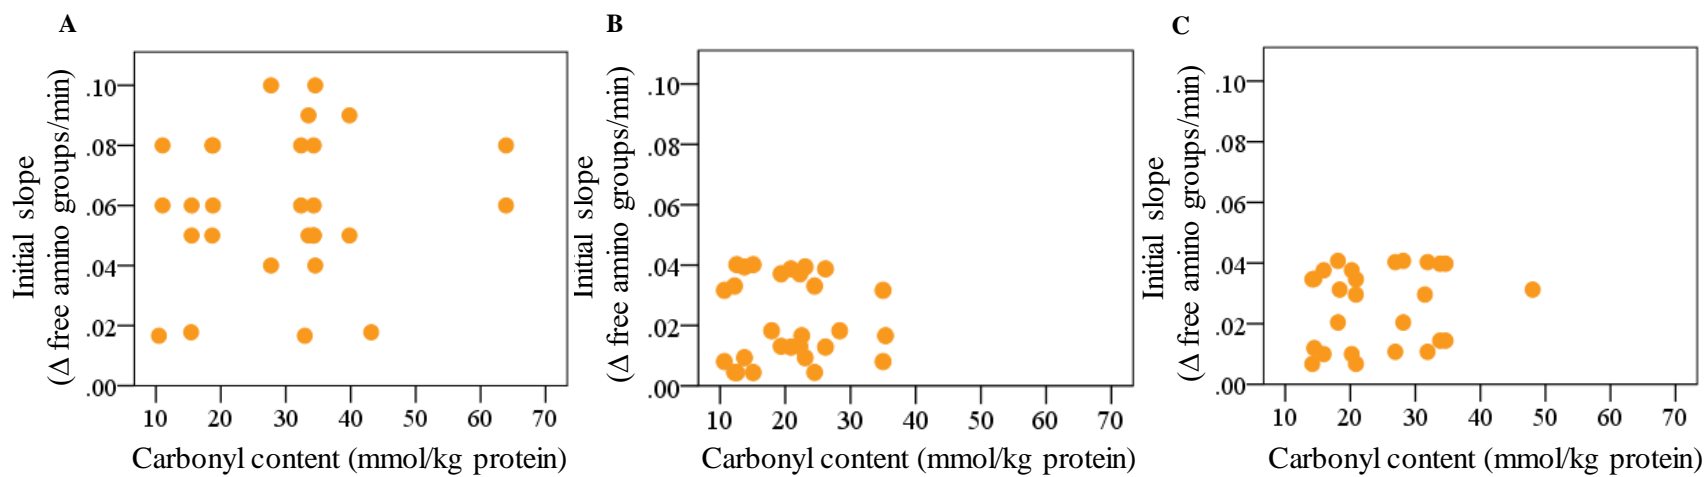

**Figure 1.** Relationship between initial slope ( $\Delta$  free amino groups/min) and carbonyl content (mmol/kg protein) of SPC (A), SPI (B) and SPI/pectin (C) samples (protein ingredients and processed matrices).

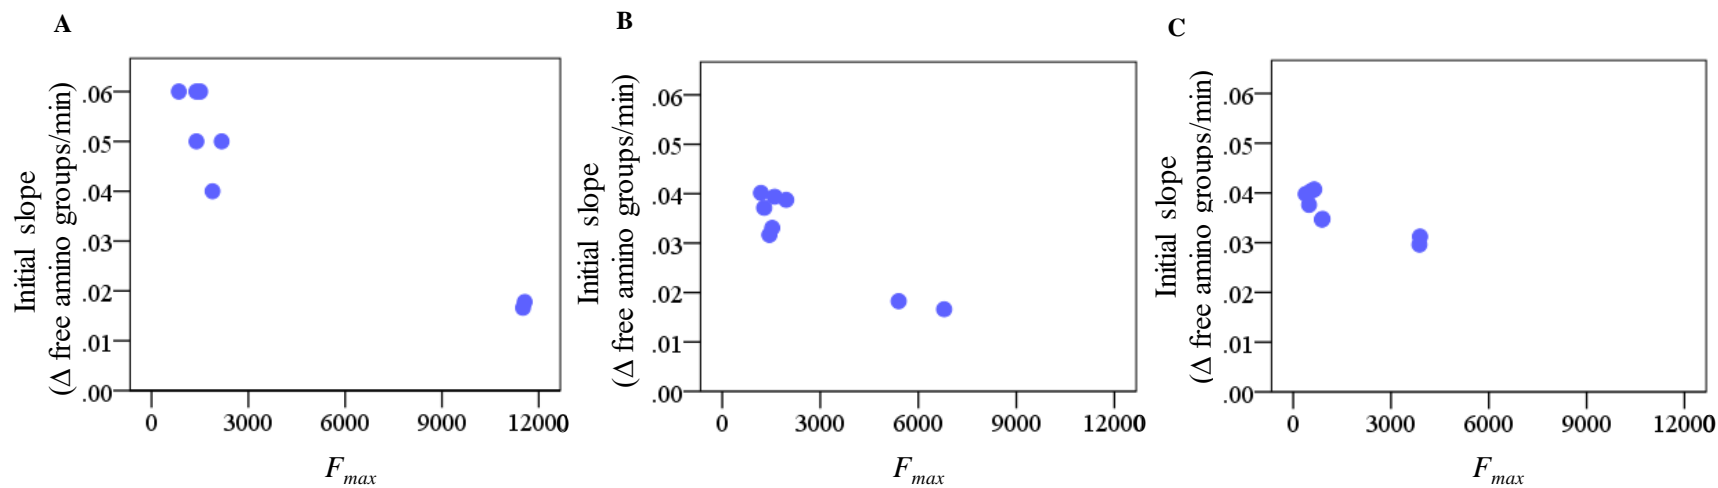

**Figure 2.** Relationship between initial slope ( $\Delta$  free amino groups/min) and exposed-surface hydrophobicity ( $F_{max}$ ) of SPC (A), SPI (B) and SPI/pectin (C) samples (protein ingredients and processed matrices).

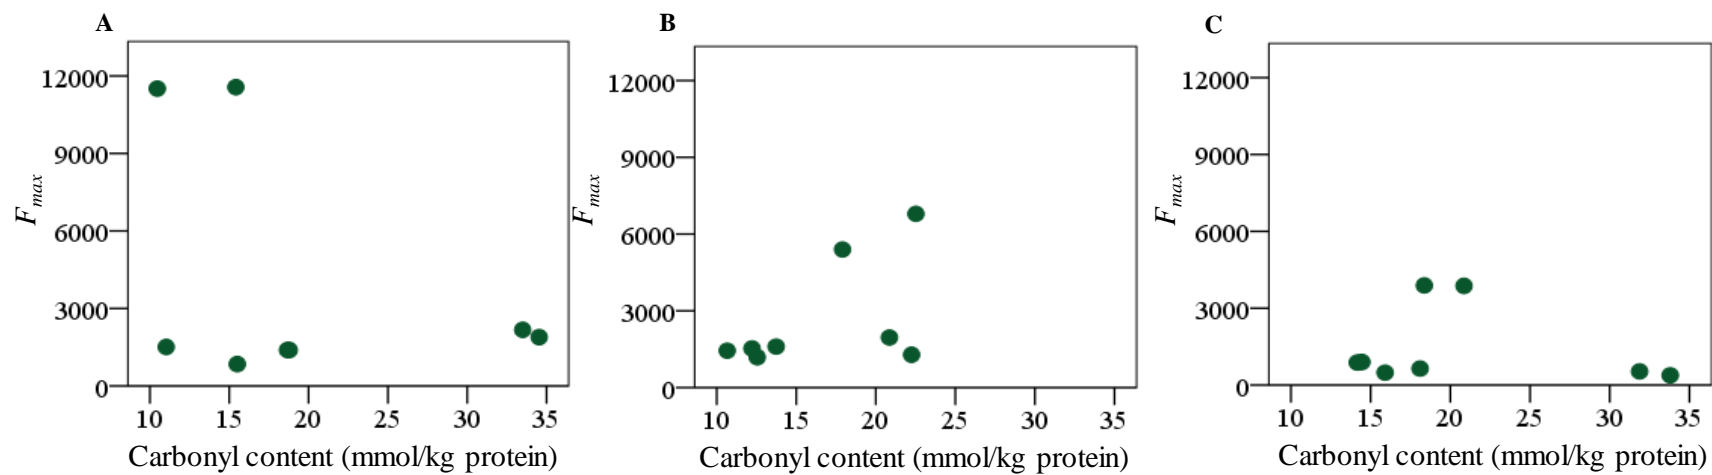

**Figure 3.** Relationship between exposed-surface hydrophobicity ( $F_{max}$ ) and carbonyl content (mmol/kg protein) of SPC (A), SPI (B) and SPI/pectin (C) samples (protein ingredients and processed matrices).

**Table 1.** Peptides size (kDa) distribution of unheated soy ingredients (protein suspensions) obtained by size-exclusion chromatography.

| Peptides size (kDa) | SPC             |                 |                 |
|---------------------|-----------------|-----------------|-----------------|
|                     | 20 min          | 60 min          | 180 min         |
| >50                 | 6.01 ± 0.28 a   | 3.80 ± 0.06 a   | 2.55 ± 0.21 a   |
| 50-10               | 27.57 ± 2.21 a  | 25.09 ± 0.12 a  | 21.51 ± 0.41 a  |
| 10-4                | 33.43 ± 3.05 a  | 34.17 ± 0.20 a  | 31.92 ± 0.60 a  |
| 4-2                 | 36.06 ± 0.00 a  | 37.39 ± 0.28 a  | 37.93 ± 0.75 a  |
| <2                  | 92.62 ± 9.49 a  | 110.81 ± 0.99 a | 122.45 ± 2.18 a |
|                     | SPI             |                 |                 |
| >50                 | 4.22 ± 0.90 a   | 2.79 ± 0.38 a   | 2.15 ± 0.07 a   |
| 50-10               | 25.50 ± 1.54 a  | 21.91 ± 0.93 b  | 19.13 ± 0.80 b  |
| 10-4                | 33.36 ± 1.83 a  | 31.69 ± 1.51 a  | 29.49 ± 1.41 a  |
| 4-2                 | 34.70 ± 1.89 a  | 35.49 ± 1.74 a  | 35.71 ± 1.72 a  |
| <2                  | 98.69 ± 5.45 a  | 108.57 ± 5.84 a | 118.91 ± 4.62 a |
|                     | SPI/pectin      |                 |                 |
| >50                 | 1.07 ± 0.48 b   | 1.39 ± 0.21 b   | 0.86 ± 0.60 a   |
| 50-10               | 11.78 ± 0.84 b  | 10.35 ± 0.22 c  | 8.50 ± 0.36 c   |
| 10-4                | 21.57 ± 1.01 b  | 20.85 ± 0.17 b  | 18.54 ± 0.29 b  |
| 4-2                 | 25.97 ± 1.18 b  | 26.76 ± 0.21 b  | 25.15 ± 0.04 a  |
| <2                  | 120.29 ± 5.77 a | 138.47 ± 1.81 b | 147.64 ± 0.06 b |

Results are expressed as mean ± standard deviation (n = 2 independent samples measured in duplicate). Different letters per column refers to significant difference among samples within the same digestion time and peptide size ( $p < 0.05$ ). Peptide size distribution of the simulated gastric fluid: > 50kDa:  $1.62 \pm 0.68$ ; 50-10 kDa:  $6.3 \pm 0.52$ ; 10-4 kDa:  $6.52 \pm 0.29$ ; 4-2 kDa:  $6.13 \pm 0.26$ ; < 2 kDa:  $28.28 \pm 1.17$  kDa.

**Table 2.** Peptides size (kDa) distribution of processed soy-based matrices obtained by size-exclusion chromatography.

| Process temperature | Peptides size (kDa) | SPC              |                 |                    |                  |                  |                  |
|---------------------|---------------------|------------------|-----------------|--------------------|------------------|------------------|------------------|
|                     |                     | Cylinder-shape   |                 |                    | Ground           |                  |                  |
|                     |                     | 20 min           | 60 min          | 180 min            | 20 min           | 60 min           | 180 min          |
| 100 °C              | >50                 | 0.93 ± 0.16 *a   | 1.97 ± 0.67 a   | 3.44 ± 0.73 a      | 3.88 ± 0.02 †a   | 4.23 ± 0.19 a    | 3.39 ± 0.30 a    |
|                     | 50-10               | 2.07 ± 0.33 *a   | 4.09 ± 0.66 *a  | 8.28 ± 1.46 *a     | 17.07 ± 0.39 †a  | 21.47 ± 0.21 †a  | 19.98 ± 0.32 †a  |
|                     | 10-4                | 3.17 ± 0.44 *a   | 6.65 ± 0.82 *a  | 14.91 ± 2.19 *a    | 21.31 ± 0.45 †a  | 29.93 ± 0.41 †a  | 30.58 ± 0.30 †a  |
|                     | 4-2                 | 3.94 ± 0.47 *a   | 7.97 ± 0.89 *a  | 18.24 ± 2.49 a     | 22.39 ± 0.45 †a  | 34.32 ± 0.49 †a  | 38.59 ± 0.38 a   |
|                     | <2                  | 40.31 ± 1.97 *a  | 59.51 ± 4.20 *a | 113.22 ± 11.11 *ab | 81.92 ± 0.88 †a  | 124.58 ± 1.02 †a | 154.05 ± 0.73 †a |
| 120 °C              | >50                 | 0.78 ± 0.04 *a   | 1.06 ± 0.17 *a  | 2.68 ± 0.75 a      | 4.62 ± 0.70 †a   | 4.43 ± 0.46 †a   | 3.27 ± 0.14 a    |
|                     | 50-10               | 1.85 ± 0.00 *a   | 3.33 ± 0.48 *a  | 7.62 ± 1.90 *a     | 18.01 ± 1.14 †ab | 21.75 ± 0.88 †a  | 20.19 ± 0.05 †a  |
|                     | 10-4                | 2.82 ± 0.08 *a   | 5.60 ± 0.75 *a  | 13.38 ± 3.02 *a    | 22.09 ± 1.26 †a  | 29.71 ± 1.22 †a  | 30.33 ± 0.13 †a  |
|                     | 4-2                 | 3.52 ± 0.09 *a   | 6.73 ± 0.83 *a  | 16.00 ± 3.40 a     | 23.23 ± 1.32 †a  | 33.96 ± 1.52 †a  | 38.05 ± 0.24 a   |
|                     | <2                  | 38.74 ± 0.05     | 54.27 ± 3.46 *b | 101.19 ± 15.18 *b  | 84.07 ± 3.66 †a  | 121.87 ± 5.89 †a | 150.21 ± 1.97 †a |
| 140 °C              | >50                 | 1.04 ± 0.00 *a   | 1.93 ± 0.07 *a  | 4.94 ± 0.44 a      | 5.83 ± 0.24 †b   | 5.71 ± 0.02 b    | 3.71 ± 0.12 †a   |
|                     | 50-10               | 2.65 ± 0.01 *a   | 5.51 ± 0.12 *b  | 12.75 ± 0.77 *a    | 20.27 ± 0.26 †b  | 24.28 ± 0.14 †b  | 21.84 ± 0.04 †b  |
|                     | 10-4                | 3.62 ± 0.07 *a   | 8.40 ± 0.20 *a  | 20.60 ± 1.08 *a    | 23.50 ± 0.62 †a  | 31.25 ± 0.46 †a  | 30.81 ± 0.12 †a  |
|                     | 4-2                 | 4.35 ± 0.11 *a   | 9.91 ± 0.26 *a  | 24.64 ± 1.19 a     | 24.34 ± 0.82 †a  | 35.19 ± 0.73 †a  | 37.84 ± 0.13 a   |
|                     | <2                  | 45.06 ± 0.44 *ab | 73.47 ± 1.47 *c | 155.03 ± 5.45 a    | 87.16 ± 1.97 †a  | 125.28 ± 3.10 †a | 145.78 ± 0.08 a  |
|                     |                     | SPI              |                 |                    |                  |                  |                  |
|                     |                     | Cylinder-shape   |                 |                    | Ground           |                  |                  |
|                     |                     | 20 min           | 60 min          | 180 min            | 20 min           | 60 min           | 180 min          |
| 100 °C              | >50                 | 0.39 ± 0.17 *a   | 0.21 ± 0.05 *a  | 0.07 ± 0.02 *a     | 2.26 ± 0.34 †a   | 3.03 ± 0.58 †a   | 1.82 ± 0.09 †a   |
|                     | 50-10               | 1.88 ± 0.06 *a   | 1.81 ± 0.05 *a  | 2.00 ± 0.02 *a     | 14.18 ± 1.36 †   | 20.23 ± 0.68 †a  | 21.27 ± 0.35 †a  |
|                     | 10-4                | 3.17 ± 0.10 *a   | 3.96 ± 0.15 *a  | 6.24 ± 0.26 *a     | 17.48 ± 2.04 †   | 27.87 ± 2.50 †a  | 32.06 ± 0.10 †a  |
|                     | 4-2                 | 4.47 ± 0.15 *a   | 6.56 ± 0.29 *a  | 12.10 ± 0.56 *a    | 17.65 ± 2.31 †   | 30.65 ± 4.01 †a  | 37.63 ± 0.06 †a  |
|                     | <2                  | 29.44 ± 0.93 *a  | 44.27 ± 1.57 *a | 87.97 ± 3.79 *a    | 59.18 ± 1.85 †   | 93.87 ± 13.13 †a | 116.56 ± 2.36 †a |
| 120 °C              | >50                 | 0.21 ± 0.17 *a   | 0.16 ± 0.05 *b  | 0.09 ± 0.02 *a     | 3.05 ± 0.13 †a   | 2.93 ± 0.53 †a   | 1.61 ± 0.11 †a   |
|                     | 50-10               | 1.69 ± 0.28 *a   | 1.89 ± 0.02 *a  | 2.17 ± 0.08 *a     | 14.65 ± 1.11 †a  | 20.34 ± 0.79 †a  | 21.20 ± 0.48 †a  |
|                     | 10-4                | 3.10 ± 0.19 *a   | 4.18 ± 0.10 *a  | 6.72 ± 0.47 *a     | 17.75 ± 1.86 †a  | 27.93 ± 2.49 †a  | 31.84 ± 0.35 †a  |
|                     | 4-2                 | 4.53 ± 0.19 *a   | 6.87 ± 0.24 *a  | 12.89 ± 1.03 *a    | 17.89 ± 2.15 †a  | 30.70 ± 3.91 †a  | 37.48 ± 0.07 †a  |
|                     | <2                  | 28.52 ± 0.54 *a  | 43.87 ± 1.62 *a | 85.38 ± 1.18 *a    | 60.79 ± 0.43 †a  | 93.42 ± 12.73 †a | 120.98 ± 6.61 †a |
| 140 °C              | >50                 | 1.97 ± 0.23 *b   | 2.12 ± 0.14 ±c  | 1.90 ± 0.15 b      | 2.84 ± 0.04 †a   | 2.79 ± 0.36 a    | 2.07 ± 0.09 b    |
|                     | 50-10               | 7.64 ± 0.00 *b   | 10.08 ± 0.37 *b | 14.43 ± 1.25 *b    | 14.62 ± 1.16 †a  | 20.35 ± 1.28 †a  | 21.78 ± 0.29 †a  |
|                     | 10-4                | 8.88 ± 0.07 *b   | 13.01 ± 0.48 *b | 21.20 ± 2.14 *b    | 17.66 ± 1.90 †a  | 27.88 ± 2.82 †a  | 32.19 ± 0.32 †a  |
|                     | 4-2                 | 8.89 ± 0.09 *b   | 14.00 ± 0.53 *b | 25.17 ± 2.75 *b    | 17.76 ± 2.19 †a  | 30.58 ± 4.19 †a  | 37.77 ± 0.57 †a  |
|                     | <2                  | 38.62 ± 0.02 *b  | 54.08 ± 1.48 b  | 88.90 ± 9.74 a     | 59.87 ± 0.43 †a  | 92.41 ± 14.03 a  | 117.55 ± 1.55 a  |
|                     |                     | SPI/pectin       |                 |                    |                  |                  |                  |
|                     |                     | Cylinder-shape   |                 |                    | Ground           |                  |                  |
|                     |                     | 20 min           | 60 min          | 180 min            | 20 min           | 60 min           | 180 min          |
| 100 °C              | >50                 | 1.80 ± 0.33 a    | 2.33 ± 0.19 *a  | 3.58 ± 0.04 a      | 3.11 ± 0.49 a    | 2.95 ± 0.03 †a   | 3.71 ± 1.26 a    |
|                     | 50-10               | 4.01 ± 0.67 *a   | 7.47 ± 0.25 *a  | 14.23 ± 0.83 *a    | 13.19 ± 0.81 †a  | 17.07 ± 0.54 †a  | 19.47 ± 0.35 †a  |
|                     | 10-4                | 5.51 ± 0.63 *a   | 10.58 ± 0.17 *a | 21.09 ± 1.45 *a    | 17.13 ± 0.83 †a  | 25.10 ± 0.84 †a  | 30.56 ± 0.91 †a  |
|                     | 4-2                 | 5.88 ± 0.59 *a   | 11.37 ± 0.26 *a | 23.42 ± 1.32 *a    | 17.92 ± 0.92 †a  | 28.76 ± 0.69 †a  | 38.30 ± 1.71 †a  |
|                     | <2                  | 37.52 ± 1.07 *a  | 52.05 ± 0.58 *a | 85.27 ± 0.42 *a    | 62.33 ± 1.83 †a  | 96.69 ± 1.75 †a  | 136.11 ± 8.12 †a |
| 120 °C              | >50                 | 0.86 ± 0.12 *b   | 1.31 ± 0.00 *b  | 2.14 ± 0.20 *b     | 4.32 ± 0.60 †a   | 4.44 ± 0.16 †b   | 3.62 ± 0.02 †a   |
|                     | 50-10               | 2.11 ± 0.19 *b   | 4.16 ± 0.07 *b  | 7.37 ± 0.06 *b     | 17.24 ± 1.06 †b  | 23.34 ± 0.94 †b  | 24.84 ± 0.07 †b  |
|                     | 10-4                | 3.46 ± 0.18 *b   | 6.97 ± 0.04 *b  | 13.25 ± 0.01 *b    | 20.07 ± 1.21 †a  | 30.37 ± 1.29 †b  | 35.71 ± 0.01 †b  |
|                     | 4-2                 | 4.45 ± 0.18 *a   | 8.71 ± 0.02 *b  | 16.91 ± 0.06 *b    | 58.32 ± 2.82 †b  | 88.92 ± 3.39 †b  | 98.86 ± 26.22 †a |
|                     | <2                  | 43.37 ± 0.86 *b  | 64.90 ± 0.36 *b | 112.08 ± 1.08 *b   | 58.32 ± 2.82 †a  | 88.92 ± 3.39 †a  | 118.35 ± 1.35 †b |
| 140 °C              | >50                 | 1.22 ± 1.22 *ab  | 1.81 ± 1.81 *b  | 2.88 ± 2.88 ab     | 4.28 ± 0.24 †a   | 5.21 ± 0.43 †b   | 4.53 ± 0.40 a    |
|                     | 50-10               | 2.82 ± 0.01 *ab  | 5.64 ± 0.36 *b  | 11.47 ± 1.66 *ab   | 16.76 ± 0.31 †b  | 23.90 ± 1.20 †b  | 27.60 ± 0.84 †a  |
|                     | 10-4                | 4.04 ± 0.07 *ab  | 7.91 ± 0.54 *b  | 16.74 ± 2.13 *ab   | 19.12 ± 0.30 †a  | 29.81 ± 1.37 †b  | 38.01 ± 1.09 †b  |
|                     | 4-2                 | 4.60 ± 0.02 *a   | 8.96 ± 0.61 *b  | 19.29 ± 2.34 *ab   | 56.15 ± 0.64 †b  | 85.77 ± 2.84 †b  | 82.61 ± 2.11 †a  |
|                     | <2                  | 35.49 ± 0.98 *a  | 48.64 ± 1.38 *a | 78.21 ± 6.87 *a    | 56.15 ± 0.64 †a  | 85.77 ± 2.84 †a  | 121.47 ± 3.15 †b |

Results are expressed as mean ± standard deviation (n = 2 independent, each one measured in duplicate). Different icons (\*/†) refers to significant difference between cylinder-shape and ground samples, within the same digestion time and peptide size (no icon = no difference) ( $p < 0.05$ ). Different letters per column refers to significant difference among samples processed with different temperatures, within the same digestion time and peptide size ( $p < 0.05$ ). Peptide size distribution of the simulated gastric fluid: > 50kDa:  $1.62 \pm 0.68$ ; 50-10 kDa:  $6.3 \pm 0.52$ ; 10-4 kDa:  $6.52 \pm 0.29$ ; 4-2 kDa:  $6.13 \pm 0.26$ ; < 2 kDa:  $28.28 \pm 1.17$  kDa.
